# Supplementary material
Source: PubMed Central journal article supplement (PMC4872304)
Supplement: supp_JCO.2012.42.3863_data_supplement_JCO.2012.42.3863.pdf [file supp_JCO.2012.42.3863_data_supplement_JCO.2012.42.3863.pdf]

**The Myeloproliferative Neoplasm Symptom Assessment Form Total Symptom Score (MPN-SAF TSS): Prospective International Assessment of an Abbreviated Symptom Burden Scoring System among 1408 MPN Patients**

**SCHERBER et. al.**

**Figure 1. The Myeloproliferative Neoplasm Symptom Assessment Form Total**

**Myeloproliferative Neoplasm Symptom Assessment Form  
Total Symptom Score (MPN-SAF TSS)**

| <b>Symptom</b>                                                                                                                                   | <b>1 to 10 (0 if absent) ranking<br/>1 is most favorable and 10 least favorable</b> |
|--------------------------------------------------------------------------------------------------------------------------------------------------|-------------------------------------------------------------------------------------|
| Please rate your fatigue (weariness, tiredness) by circling the one number that best describes your WORST level of fatigue during past 24 hours* | (No Fatigue) 0 1 2 3 4 5 6 7 8 9 10 (Worst Imaginable)                              |
| <b>Circle the one number that describes how, during the past week how much difficulty you have had with each of the following symptoms</b>       |                                                                                     |
| Filling up quickly when you eat (Early satiety)                                                                                                  | (Absent) 0 1 2 3 4 5 6 7 8 9 10 (Worst Imaginable)                                  |
| Abdominal discomfort                                                                                                                             | (Absent) 0 1 2 3 4 5 6 7 8 9 10 (Worst Imaginable)                                  |
| Inactivity                                                                                                                                       | (Absent) 0 1 2 3 4 5 6 7 8 9 10 (Worst Imaginable)                                  |
| Problems with concentration - Compared to prior to my MPD                                                                                        | (Absent) 0 1 2 3 4 5 6 7 8 9 10 (Worst Imaginable)                                  |
| Numbness/ Tingling (in my hands and feet)                                                                                                        | (Absent) 0 1 2 3 4 5 6 7 8 9 10 (Worst Imaginable)                                  |
| Night sweats                                                                                                                                     | (Absent) 0 1 2 3 4 5 6 7 8 9 10 (Worst Imaginable)                                  |
| Itching (pruritus)                                                                                                                               | (Absent) 0 1 2 3 4 5 6 7 8 9 10 (Worst Imaginable)                                  |
| Bone pain (diffuse not joint pain or arthritis)                                                                                                  | (Absent) 0 1 2 3 4 5 6 7 8 9 10 (Worst Imaginable)                                  |
| Fever (>100 F)                                                                                                                                   | (Absent) 0 1 2 3 4 5 6 7 8 9 10 (Daily)                                             |
| Unintentional weight loss last 6 months                                                                                                          | (Absent) 0 1 2 3 4 5 6 7 8 9 10 (Worst Imaginable)                                  |

\* Question used with permission from the MD Anderson Cancer Center Brief Fatigue Inventory ©
